# Supplementary material for: Biological treatment approach to inflammatory bowel disease is similar in academic and nonacademic centres – prime time for decentralisation of inflammatory bowel disease care?
Source: PubMed Central journal article supplement — Eur J Gastroenterol Hepatol. 2024 Apr 2;36(6):728–34. doi: 10.1097/MEG.0000000000002771 (PMC11045401; doi:10.1097/meg.0000000000002771), 2024-04-02
Supplement: ejgh-36-728-s001.pdf [file ejgh-36-728-s001.pdf]

## SUPPLEMENTARY MATERIALS:

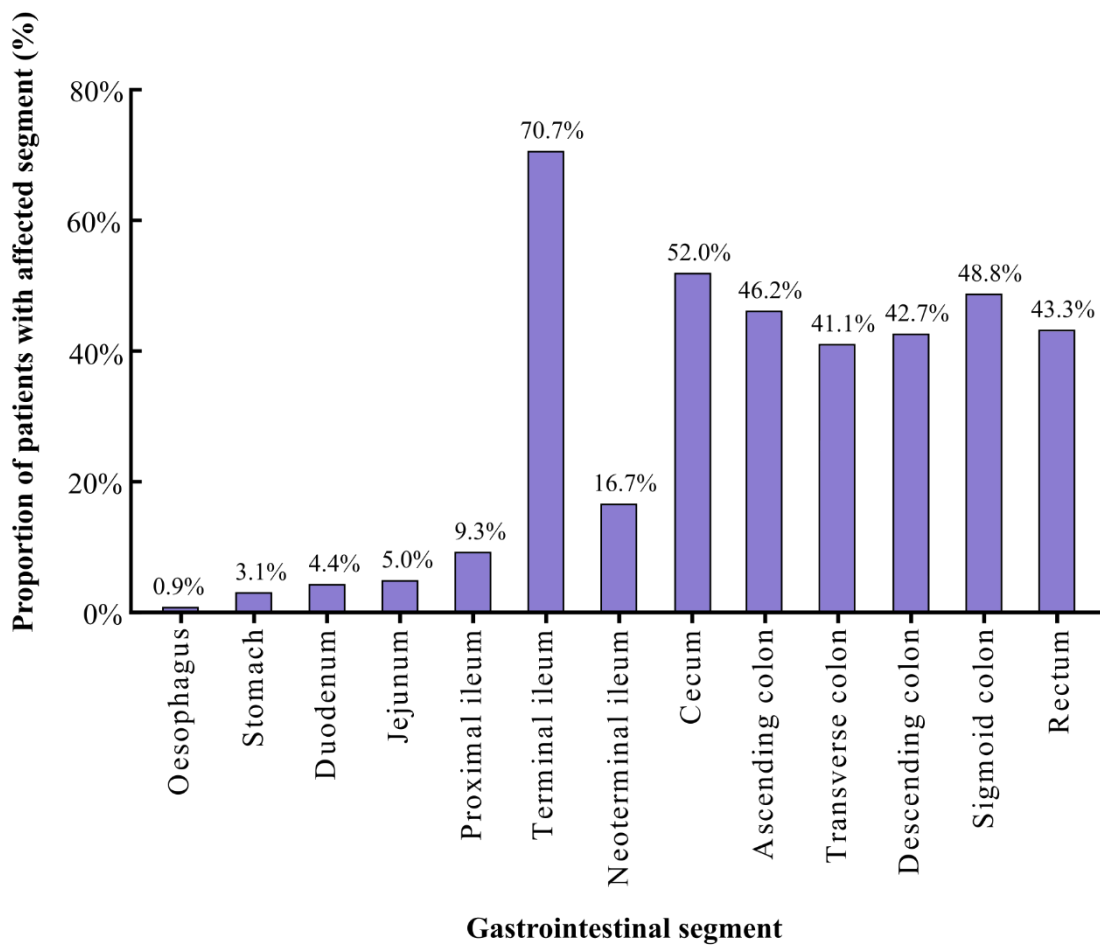**Supplementary Figure 1:** Disease extension of Crohn's disease

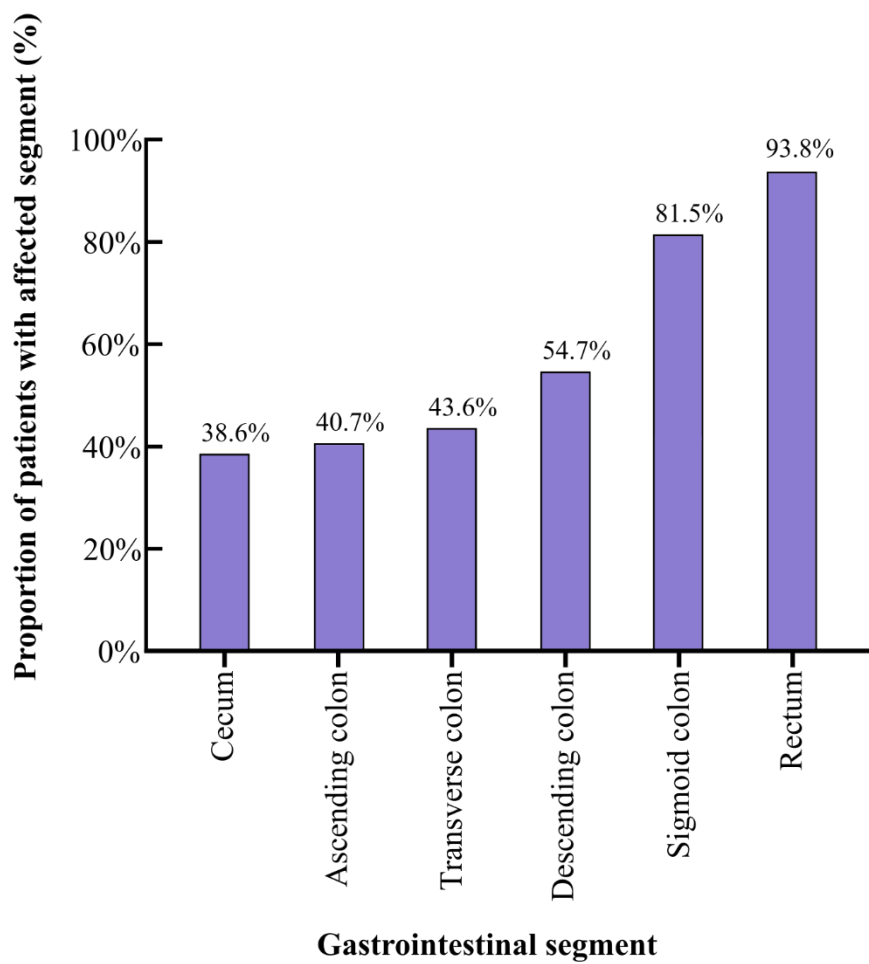

**Supplementary Figure 2:** Disease extension of ulcerative colitis

Supplementary Table 1: Risk factors for disease complications in specific IBD centres in Slovenia

|                         | Academic IBD* centres |               | Nonacademic IBD centres |                  |                    |                | p value |
|-------------------------|-----------------------|---------------|-------------------------|------------------|--------------------|----------------|---------|
|                         | LJ<br>(n=1950)        | MB<br>(n=369) | Celje<br>(n=183)        | Izola<br>(n=194) | Jesenice<br>(n=29) | Bled<br>(n=23) |         |
| <b>Pancolitis</b>       | 630 (32.3%)           | 155 (42.0%)   | 71 (38.8%)              | 65 (33.5%)       | 11 (37.9%)         | 5 (21.7%)      | 0.003   |
| <b>Perianal disease</b> | 191 (9.8%)            | 53 (14.4%)    | 20 (10.9%)              | 14 (7.2%)        | 1 (3.4%)           | 0              | 0.018   |
| <b>Ileal disease</b>    | 248 (12.7%)           | 38 (10.3%)    | 17 (9.3%)               | 17 (8.8%)        | 4 (13.8%)          | 2 (8.7%)       | 0.407   |

\*IBD – inflammatory bowel disease

Supplementary Table 2: Number of prescriptions (treatment episodes) of respective lines of therapy

| Line               | All  | Adalimumab/<br>biosimilars | Adalimumab/<br>Humira | Golimumab | Infliximab/<br>biosimilars | Infliximab/<br>Remicade | Ustekinumab | Vedolizumab | Others |
|--------------------|------|----------------------------|-----------------------|-----------|----------------------------|-------------------------|-------------|-------------|--------|
| <b>First line</b>  | 1687 | 155                        | 327                   | 61        | 368                        | 257                     | 149         | 369         | 1      |
| <b>Second line</b> | 703  | 33                         | 137                   | 11        | 131                        | 64                      | 151         | 176         | 0      |
| <b>Third line</b>  | 280  | 8                          | 28                    | 4         | 38                         | 11                      | 105         | 85          | 1      |
| <b>Fourth line</b> | 87   | 5                          | 5                     | 1         | 8                          | 7                       | 41          | 19          | 1      |
| <b>Fifth line</b>  | 23   | 1                          | 3                     | 2         | 2                          | 0                       | 10          | 4           | 1      |
| <b>Sixth line</b>  | 1    | 1                          | 0                     | 0         | 0                          | 0                       | 0           | 0           | 0      |
| <b>Total*</b>      | 2781 | 203                        | 500                   | 79        | 547                        | 339                     | 456         | 653         | 4      |
